1 **Utility of TaqMan Array Cards for detection of Acute febrile illness etiologies in patients**  
2 **suspected of Viral Hemorrhagic Fever Infections in Uganda**

3 **Authors:** Akurut GG<sup>1,4</sup>, Nyakarahuka L<sup>2,4</sup>, Whitmer S<sup>3</sup>, Namanya D<sup>2</sup>, Kilama K<sup>1</sup>, Mulei S<sup>2</sup>,  
4 Baluku J<sup>2</sup>, Tumusime A<sup>2</sup>, Kyondo J<sup>2</sup>, Julius J Lutwama, Trevor Shoemaker, Patel K<sup>3</sup>, Joel  
5 Montgomery, Klena JD<sup>3</sup>, Balinandi S<sup>2</sup>

6 **Corresponding Author**

7 Gloria Grace Akurut; akurutgloria@gmail.com

8 **Institutional affiliation**

9 Uganda Wildlife Authority<sup>1</sup>, Uganda Virus Research Institute<sup>2</sup>, Centers for Disease Control and  
10 Prevention<sup>3</sup>, College of Veterinary Medicine Animal Resources and Biosecurity, Makerere  
11 University<sup>4</sup>

12 **Abstract**

13 **Introduction:** Attributing a causative agent to acute febrile illnesses (AFI) remains a challenging  
14 diagnostic task for clinical and public health laboratories. The need for developing, validating  
15 and implementing a multi-pathogen diagnostic assay able to detect a wide range of AFI-  
16 associated pathogens should be prioritized in low-resource settings. The use of the previously  
17 developed Acute Febrile Illness TaqMan Array card (AFI-TAC), which detects 26 pathogens in  
18 less than 2 hours post-sample nucleic acid extraction, was selected for evaluation in Uganda.

19 **Methods:** This was a cross-sectional retrospective study in which archived viral hemorrhagic  
20 fever (VHF)-negative blood and plasma samples were selected. Samples were previously tested  
21 and archived at the Uganda Virus Research Institute (UVRI)-Viral Hemorrhagic Fever (UVRI-  
22 VHF) Laboratory from August 2018 to March 2019 as part of the routine surveillance program.  
23 The VHF case definition included, temperature of  $\geq 38.0$  °C, additionally with bleeding and any  
24 other febrile symptoms. Samples were then tested using an AFI-TAC for 35 potential pathogen  
25 targets. Selected positive samples were subsequently assessed using a second, pathogen-specific  
26 simplex PCR assay. Epidemiological data were linked to the laboratory findings to assess for risk  
27 factors for infection.

28 **Results:** A total of 82 samples were selected for this study, of which 152 (83.52%) were from  
29 Uganda, 22 (12.09%) from the Democratic Republic of the Congo, 7 (3.85 %) from South  
30 Sudan, and 1 (0.55%) from Kenya. The median age of the patients was 27 years, with 145  
31 (79.67%) samples from adults >18 years. Seven pathogens were detected with the most prevalent  
32 being *Plasmodium* spp. 26.92% (49/182) of which 69.4% (34/49) were *Plasmodium falciparum*,  
33 *Yellow fever virus* 2 (1.10 %), non-typhoidal *Salmonella* 3 (1.65%), *Salmonella enterica serovar*  
34 *Typhi* (1.10%), *Leptospira* spp. 1 (0.54%), *Streptococcus pneumoniae* (0.55%), and *Rickettsia*  
35 spp. (0.55%). Epidemiological correlation revealed a significant relationship between case  
36 fatality (p=0.002) and disease while age, occupation, sex and disease were not significant.

37 Cough was found to be the only clinical symptom associated with being infected with  
38 *Plasmodium* (p=0.016).

39 **Conclusion:** The use of TAC is feasible, readily adoptable diagnostic assay for use in Uganda  
40 and will be useful when incorporated into the national testing algorithm for the differential  
41 diagnosis of AFI during an outbreak and surveillance.

#### 42 **Key words**

43 Taqman array card, viral hemorrhagic fever, acute febrile illness, etiologies

#### 44 **Background**

45 Viral hemorrhagic fevers (VHF) are acute febrile illnesses (AFI) characterized by fever with  
46 body temperatures  $\geq 37.5^{\circ}\text{C}$  which may persist for longer than 72 hours. Other symptoms  
47 commonly associated with AFI include headache, cough, vomiting, diarrhea, fatigue, and  
48 convulsions. Establishing a causative agent based solely on clinical presentation remains a  
49 challenge due to the non-specific clinical presentation of AFI, making it difficult to infer a  
50 particular symptom to a specific disease. And without laboratory diagnostic testing, treatment is  
51 often delayed or ineffective (Maze *et al.*, 2018). This is especially important in countries that  
52 have experienced multiple, and often simultaneous outbreaks of diseases caused by VHFs such  
53 as filoviruses, Rift Valley Fever virus (RVFV), and /or Crimean Congo Hemorrhagic Fever virus  
54 (CCHFV) that are capable of spreading rapidly through human and animal populations. Yet,  
55 these pathogens are of significant public health concern and their detection and control is  
56 important for global health security and socio-economic stability (Balinandi *et al.*, 2024,  
57 Shoemaker *et al.*, 2013). In Uganda, because malaria caused by *Plasmodium falciparum* is a  
58 major cause of AFI, many patients with fever are placed on antimalarial prophylaxis in the  
59 absence of laboratory diagnostic testing (Ghai *et al.*, 2016) which has resulted in several cases of  
60 antimalarial resistance (Agaba *et al.*, 2024), or generally what is called Antimicrobial resistance  
61 (Mambula *et al.*, 2023) in Uganda. Moreover, the approach of symptomatic treatment in  
62 hospitals has been associated with the under-diagnosis of other AFIs known to exist in Uganda  
63 that include brucellosis, leptospirosis, rickettsia, chikungunya, Dengue fever and orthopoxvirus  
64 infection (Kharod *et al.*, 2016), as has been revealed in the recently implemented Mortuary  
65 Surveillance Program (manuscript in preparation).

66 Diagnosis of a VHF is highly dependent on the direct detection of the causative virus by culture  
67 or the presence of viral nucleic acids in the sample from a suspect case. Although the humoral  
68 immune response can be utilized, (Racsá *et al.*, 2016) it is not practically used for diagnosis.  
69 Traditional methods of clinical microbiology such as isolation which requires BSL-4 lab and  
70 convalescent-phase serology are slow and cumbersome, and values from common laboratory  
71 parameters like urinalysis, chemistries, and hematology are not unique, although they may guide  
72 patient identification. Molecular diagnosis of infectious diseases using nucleic acid amplification  
73 techniques (NAAT) such as the polymerase chain reaction (PCR) can be designed to be highly  
74 sensitive and specific to detect infectious agents. To increase the efficiency of detection, NAAT

75 methods are being designed to target more than one infectious agent in an assay; however,  
76 multiplex methods are often less sensitive compared to the singleplex (Hajia, 2017). Taqman  
77 Array Cards (TAC) are microfluidic test cards designed to perform multiple real-time PCR  
78 specific for several different pathogens (depending on the TAC configuration) using primers and  
79 probes preloaded in to the microwells of a 384 well plate. Between 1-8 samples can be tested in  
80 parallel against 12 to 384 assay targets in as little as 10fg of DNA isolated from pure bacterial  
81 cultures (Rose *et al.*, 2012) using TAC. At the current estimates, the cost of using the TAC is  
82 ~80 USD per sample. When analytical validation using clinical specimens was compared  
83 between AFI TAC performance and individual PCR assays, an 88% sensitivity and 99%  
84 specificity was observed (Liu *et al.*, 2016). Thus, the multi-pathogen detection card is convenient  
85 for screening AFIs during outbreaks or routine surveillance, consequently reducing the time  
86 taken to ascertain the cause of illness, and therefore prophylaxis. Whereas NGS provides the  
87 technical solution for pathogen detection efficiency, conclusive results usually take long to be  
88 obtained and it is expensive (Lesho *et al.*, 2016). The TAC is designed to avoid amplicon  
89 contamination with improved detection efficiency for multiple pathogens.

90 In Uganda, routine VHF surveillance is conducted year-round at the Uganda Virus Research  
91 Institute (UVRI). The majority of samples submitted from symptomatic patients test negative for  
92 a VHF, yet due to their acute and fulminant nature of illness, there is a need to identify the  
93 causative etiologies these patients suffer from (Balinandi *et al.*, 2024). A multi-pathogen  
94 detection assay for differential diagnosis of acute febrile illnesses reduces the time taken to  
95 detect numerous etiologies which can lead to timely public health interventions. This study  
96 utilized the TAC assay to detect alternative etiologies for illnesses in patients whose samples  
97 tested negative for VHFs.

## 98 **Materials and methods**

### 99 ***Study design and population***

100 This cross-sectional retrospective study utilized 182 archived samples submitted to the VHF  
101 laboratory at UVRI from August 2018 to March 2019 as part of the National VHF surveillance  
102 program testing. The study was given approval by the Director General of the Ministry of  
103 Health, Republic of Uganda.

### 104 ***Inclusion and exclusion criteria***

105 Patients presenting with high fever, with or without hemorrhagic signs, and that tested negative  
106 by real-time PCR using primers specific for VHF viruses including Marburg virus, Ebola viruses  
107 (Sudan, Bundibugyo and Zaire), Crimean Congo Hemorrhagic Fever virus (CCHF) and Rift  
108 Valley Fever virus (RVF), were included in this study. Six known positive samples (RVFV= 5  
109 and CCFV= 1) were used to verify the TAC assay characteristics. VHF surveillance samples  
110 collected between August 2018 and March 2019 were included in this study.

111 ***Sample acquisition and nucleic acid extraction***

112 Study samples were retrieved from storage freezers and thawed at 4°C overnight. All  
113 downstream procedures for RNA extraction used the MagMax RNA isolation kit (ThermoFisher  
114 scientific, Carlifornia, USA), according to the manufacturer’s instructions. Briefly, from each  
115 sample, 100 µl was removed for RNA extraction using an automated Magmax 15 well bead-  
116 based extractor (Applied Biosystems, ThermoFisher scientific, Carlifornia, USA,). Samples were  
117 inactivated in a high containment laboratory (HCL) by adding 100 µl of patient blood or  
118 nuclease free water (negative control) to 400 µl of lysis buffer to which 2 µl of carrier RNA had  
119 been added. This was followed by 10 minutes of incubation before transfer of inactivated  
120 samples into sterile cryogenic vials and removal from the HCL to a BSL-2 low-containment  
121 laboratory for nucleic acid extraction. Inactivated samples were extracted according to the  
122 manufacturer’s instructions and eluted in 90µl of elution buffer. The eluates were transferred to  
123 sterile labelled tubes and stored at □ 20 °C or kept at 4 °C for immediate analysis.

124 ***Taqman Array Card preparation and analysis***

125 Taqman Array cards first described by (Liu *et al.*, 2016), detecting 26 AFI associated etiologies  
126 were used. Each TAC tested a total of six patient samples, a positive and a negative control.  
127 Mastermix was prepared to include 1x Ag-Path-ID 2X rt PCR buffer and the enzyme mix  
128 (Applied Biosystems ThermoFisher scientific, Carlifornia, USA). Into each microfuge tube, 80  
129 µl of the prepared master mix and 20 µl of the RNA were added. This was followed by brief  
130 vortexing to mix them and then a short spin.

131 TAC cards were equilibrated to ambient temperature in their original packages prior to use. 100  
132 µl of each sample mix was added into the inlet port of each channel, the card centrifuged at  
133 1,200 rpm for 2 min, the ports sealed and removed following the manufacturer’s instructions.  
134 Amplification was performed on a VIIA7 real-time PCR system (Life Technologies) using the  
135 cycling conditions as follows 20 min 45 °C, 10 min 95 °C, followed by 40 cycles of 15 sec 95  
136 °C, 1 min 60 °C. Samples with a cycle threshold (Ct) fluorescent signal of ≤35 were considered  
137 positive for the detected agent.

138 The data was organized in excel and analyzed in R-studio (MA,  
139 Boston, USA). Univariate analysis was done to determine demographic characteristics and the  
140 frequency of disease occurrence among the different demographic characteristics. A generalized  
141 linear model (glm) was developed to determine the general influence of occupation, age and  
142 gender on the acquisition of a disease; this was done to attain estimates (odds ratios), and F-  
143 statistics all measured at a 95% level of significance. Logistic regression modelling was done to  
144 determine the relationship between clinical symptoms and *Plasmodium* infections and the model  
145 was validated using the Akaike information criterion (AIC) value.

146 **Results**

147 ***Socio-demographic characteristics of study participants***

148 A total of 182 samples collected from August 2018 to March 2019 met the inclusion criteria. Of  
 149 the 182 samples, 64.29% were from males, the median age of the patients was 27 years (range 0-  
 150 80 years) and 79.67% were adults. The geographical distribution of samples selected under this  
 151 study was as follows; Uganda (n=149; 81.7%), Democratic Republic of Congo (n= 21; 11.8%),  
 152 South Sudan (n=7; 3.76%), Kenya (n=1; 0.54%), and n=2; (2.15%) having no country of  
 153 residence recorded on the case report form. From Uganda, the regions were divided into three,  
 154 West (n=106; 1%), Central (n=27; 18%) and North (n=16; 11%), (refer to Table 1).

155 ***Pathogens detected by TAC***

156 TAC detected 7 pathogens targets in (32%) samples (Table 1). The major etiologies detected  
 157 were *Plasmodium* spp., 26.9% (49/182), particularly 69% (34/49) were determined to be  
 158 *Plasmodium falciparum* species. Other etiologies detected include; *Salmonella* spp. (n=3;  
 159 1.65%), while Yellow Fever virus (n=2; 1.1%) and *S.typhi* (n=2; 1.1%) were both detected in  
 160 two samples. *Streptococcus pneumoniae*, *Leptospira* and *Rickettsia* (0.55%) were each detected  
 161 in a single sample.

162 There was a statistical significance between case fatality and having disease (P value = 0.002  
 163 95% CI). That Case fatality rate of Leptospirosis, *Rickettsia*, *Salmonella* Typhi, *Yellow fever* and  
 164 *S. pneumoniae* was 100%, while it was 16% and 33% for plasmodium and salmonella infections,  
 165 respectively (Table 2). Samples previously positive for individual real-time PCR (IRTP) RVF  
 166 (n=5) and CCHF (n=1) were included for assay verification and there was 100% agreement as  
 167 they also tested positive by TAC. The samples that tested positive for Yellow Fever virus by  
 168 TAC were found positive by individual real time PCR. There was no statistical significance at  
 169 95% confidence that any of the clinical characteristics presented were associated with  
 170 *Plasmodium* infection besides cough (p value = 0.016 95% CI) (refer to Table 3).

171 **Table 1: Univariate analysis of disease outcome and socio-demographic parameters and**  
 172 **regions within Uganda**

| Characteristic |         | N = 182      |
|----------------|---------|--------------|
| <b>Sex</b>     |         |              |
| Male           |         | 117 (64.29%) |
| Female         |         | 65 (35.71%)  |
| <b>Age</b>     |         |              |
| <18 years      |         | 37 (20.33%)  |
| ≥18 years      |         | 145 (79.67%) |
| <b>Region</b>  |         |              |
| Uganda         | West    | 106 (71%)    |
|                | Central | 27 (18%)     |

|                                     |                     |                |
|-------------------------------------|---------------------|----------------|
|                                     | <i>North</i>        | 16 (11%)       |
| <i>Democratic Republic of Congo</i> |                     | 11.8%          |
| <i>South Sudan</i>                  |                     | 3.76%          |
| <i>Kenya</i>                        |                     | 0.54%          |
| <i>No country indicated</i>         |                     | 2.15%          |
| <b>Disease</b>                      |                     |                |
| <i>Plasmodium</i>                   | <i>P.falciparum</i> | 34/49 (69.39%) |
|                                     | <i>P.vivax</i>      | 0/49 (0%)      |
| <i>Salmonella</i>                   |                     | 3 (1.65%)      |
| <i>Yellow fever virus</i>           |                     | 2 (1.10%)      |
| <i>S. typhi</i>                     |                     | 2 (1.10%)      |
| <i>Rickettsia</i>                   |                     | 1 (0.55%)      |
| <i>Leptospira</i>                   |                     | 1 (0.55%)      |
| <i>S. pneumoniae</i>                |                     | 1 (0.55%)      |
| <i>Negative</i>                     |                     | 123 (67.58%)   |
| <b>Occupation</b>                   |                     |                |
| <i>Farmer</i>                       |                     | 64 (35.16%)    |
| <i>Child/pupil</i>                  |                     | 52 (29.57%)    |
| <i>Other</i>                        |                     | 53 (29.12%)    |
| <i>No occupation recorded</i>       |                     | 13 (7.14%)     |
| <b>Status</b>                       |                     |                |
| <i>Dead</i>                         |                     | 42 (23.08%)    |
| <i>Alive</i>                        |                     | 140 (76.92%)   |

173

174 **Table 2: Percentage frequency of diseased individuals among different demographic**  
 175 **parameters.**

| Category | n | Overall<br>N=182 | Lpt<br>n=1 | Plas<br>m | Rk<br>n=1 | Sal<br>n=3 | S.p<br>n= 1 | S.th<br>n=2 | YF<br>n=2 | p-<br>value |
|----------|---|------------------|------------|-----------|-----------|------------|-------------|-------------|-----------|-------------|
|----------|---|------------------|------------|-----------|-----------|------------|-------------|-------------|-----------|-------------|

|                    |     |     |      | <b>n=49</b> |      |      |      |      |      |              |
|--------------------|-----|-----|------|-------------|------|------|------|------|------|--------------|
| <b>Sex</b>         | 182 |     |      |             |      |      |      |      |      | 0.9          |
| <i>F</i>           |     | 36% | 0%   | 43%         | 0%   | 33%  | 0%   | 50%  | 0%   |              |
| <i>M</i>           |     | 64% | 100% | 57%         | 100% | 67%  | 100% | 50%  | 100% |              |
| <b>Age</b>         | 182 |     |      |             |      |      |      |      |      | 0.9          |
| <18                |     | 20% | 0%   | 27%         | 0%   | 0%   | 0%   | 0%   | 0%   |              |
| ≥18                |     | 80% | 100% | 73%         | 100% | 100% | 100% | 100% | 100% |              |
| <b>Occupation</b>  | 169 |     |      |             |      |      |      |      |      | 0.3          |
| <i>Farmer</i>      |     | 38% | 100% | 38%         | 0%   | 0%   | 100% | 0%   | 50%  |              |
| <i>Child/pupil</i> |     | 31% | 0%   | 40%         | 0%   | 33%  | 0%   | 0%   | 0%   |              |
| <i>Other</i>       |     | 31% | 0%   | 22%         | 100% | 67%  | 0%   | 100% | 50%  |              |
| <b>Status</b>      | 182 |     |      |             |      |      |      |      |      | <b>0.002</b> |
| <i>Dead</i>        |     | 23% | 0%   | 16%         | 100% | 33%  | 100% | 100% | 100% |              |
| <i>Alive</i>       |     | 77% | 100% | 84%         | 0%   | 67%  | 0%   | 0%   | 0%   |              |
| <b>Region</b>      | 141 |     |      |             |      |      |      |      |      | 0.4          |
| <i>North</i>       |     | 11% | 0%   | 19%         | 0%   | 0%   | 100% | 0%   | 0%   |              |
| <i>West</i>        |     | 71% | 100% | 62%         | 10%  | 67%  | 0%   | 100% | 0%   |              |
| <i>Central</i>     |     | 18% | 0%   | 19%         | 0%   | 33%  | 0%   | 0%   | 0%   |              |

176 *Disease among categories; sex, age, occupation, status and region presented in percentages.*

177 *Status; dead or alive is more associated with having the disease (statistically significant).Lpt;*

178 *Leptospira, Pl; Plasmodium, Rk; Rickettsia, Sl; Salmonella, S.p; Streptococcus pneumonia, S.t;*

179 *Salmonella typhi, YF; Yellow fever*

180 **Table 3: Association between clinical characteristics including abdominal pain, chest pain,**  
 181 **muscle pain, headache, cough, sore throat, conjunctivitis and skin rash and presence of**  
 182 **Plasmodium infections., cough is the only statistically significant clinical characteristic**

| Characteristic | OR | 95% CI | p-value |
|----------------|----|--------|---------|
|----------------|----|--------|---------|

|                                                        |      |            |              |
|--------------------------------------------------------|------|------------|--------------|
| Fever                                                  | 2.69 | 0.76, 13.1 | 0.2          |
| Bleeding                                               | 1.27 | 0.50, 3.42 | 0.6          |
| Vomiting                                               | 0.95 | 0.43, 2.10 | 0.9          |
| Diarrhea                                               | 0.71 | 0.32, 1.56 | 0.4          |
| Anorexia                                               | 1.21 | 0.57, 2.61 | 0.6          |
| Abdominal pain                                         | 0.96 | 0.45, 2.08 | >0.9         |
| Chest pain                                             | 2.13 | 0.89, 5.20 | 0.092        |
| Muscle pain                                            | 1.09 | 0.51, 2.30 | 0.8          |
| Headache                                               | 1.33 | 0.62, 2.98 | 0.5          |
| Cough                                                  | 0.32 | 0.12, 0.78 | <b>0.016</b> |
| Sore throat                                            | 0.81 | 0.26, 2.33 | 0.7          |
| Conjunctivitis                                         | 1.00 | 0.34, 2.71 | >0.9         |
| Skin rash                                              | 1.33 | 0.44, 3.90 | 0.6          |
| <sup>1</sup> OR = Odds Ratio, CI = Confidence Interval |      |            |              |

183

184

## 185 **DISCUSSION**

186 Multiplex pathogen detection tools like TAC PCR can be valuable tools for diagnosing multiple  
187 infections for infectious disease surveillance (Rose *et al.*, 2012, Hercik *et al.*, 2017). Because  
188 these systems are open, they can be custom-designed to investigate possible causes of syndromic  
189 disease (e.g. acute febrile illness) or for priority diseases within a country or region and  
190 environmental samples testing (Kodani *et al.*, 2011).

191

192 Prior to this study, after completion of the VHF testing algorithm (using simplex assays for  
193 Ebolavirus, Sudan Ebolavirus, Bundibugyo Ebolavirus, Marburg virus, Crimean-Congo  
194 Hemorrhagic fever virus and Rift Valley fever virus) at UVRI, no further testing would be  
195 performed on a sample. In this study, of the 182 VHF-negative samples tested by TAC, at least  
196 one organism was identified in 59 (32.4%) of the samples by AFI-TAC assay, practically  
197 meaning that a diagnosis of the infectious cause of disease can be made for 1 of every 3 VHF-



198 negative cases. The most prevalent pathogen was *Plasmodium* spp. interestingly, the two cases of  
199 yellow fever virus cases detected by this study triggered an outbreak investigation of this  
200 etiology in Masaka district, Central Uganda, by the Ministry of Health and was confirmed by  
201 singleplex PCR ([https://www.health.go.ug/programs/uganda-national-expanded-program-on-](https://www.health.go.ug/programs/uganda-national-expanded-program-on-immunisation-uneipi/)  
202 [immunisation-uneipi/](https://www.health.go.ug/programs/uganda-national-expanded-program-on-immunisation-uneipi/)). From this study, Yellow fever virus disease severity and mortality was  
203 associated with occupations such as hunting and farming which activities predispose people to  
204 mosquito bites. Furthermore, Yellow fever cases were males similar to the outbreak in northern  
205 Uganda that found males were more likely than females to acquire the *Yellow fever* virus. This  
206 predisposition of males towards YF infection was linked to economic activities undertaken by  
207 males around forests (Wamala *et al.*, 2012).

208  
209 Similarly, both non-typhoidal and typhoidal *Salmonella enterica* were detected with non-typhus  
210 salmonella (n=3, 1.65%), *Salmonella typhi* (n=2; 1.10%), as well as *Leptospira* (n=1; 0.54%),  
211 and *Rickettsia* (0.55%). Finally, a single case of *Streptococcus pneumoniae*, was found. A  
212 similar study from Tanzania found *Plasmodium* spp. to be the most common pathogen detected  
213 (using the identical AFI card while *Leptospira* was only 3% of cases and *Salmonella enterica*  
214 and *Rickettsia* were detected in 1% of cases (Hercik *et al.*, 2017). A study in Bangladesh found  
215 *Salmonella enterica* serovar Typhi (15%), dengue (10%), *Rickettsia*, spp. *Escherichia coli*,  
216 *Pseudomonas* spp., *Leptospira* spp., *Coxiella* spp., *Histoplasma*, and *Toxoplasma*; malaria RDT-  
217 positive patients were excluded from this study (Ferdousi *et al.*, 2023). Much as *S. pneumonia* is  
218 not described as a cause of AFI, it causes high morbidity and mortality especially in children  
219 under the age of five (Zar *et al.*, 2013)

220  
221 In this study several pathogens of outbreak potential and concern to the Uganda public health  
222 were identified as mentioned above. However, the detection of high consequence pathogens  
223 rarely reported in Uganda such as West Nile virus, *Bartonella*, and *Coxiella* was not made. To  
224 assure that the assay would have detected a variety of low frequency but high impact pathogens,  
225 this study included six RVFV and CCHFV samples (RVFV, n = 5 and CCHFV, n = 1) with a  
226 range of Ct values (25-28). All six of these samples were detected as positive for their respective  
227 pathogens by TAC with Ct values (26-29). This shows that the performance of TAC is  
228 comparable to simplex PCR.

229  
230 This study found *Plasmodium* infections to be the most prevalent, similar to findings from a  
231 study in Kilombero, Tanzania (Hercik *et al.*, 2017) where 47% of patients recruited into the  
232 study became positive for *Plasmodium*. A study on metagenomic next-generation sequencing of  
233 samples from pediatric febrile illness in Tororo, Uganda found the most prevalent AFI etiology  
234 to be *Plasmodium falciparum* at 51.1% (Ramesh *et al.*, 2019). As much as *P.vivax* targets were  
235 on the card, 15/49 samples that tested positive for plasmodium still remain unspciated. The  
236 rarity and low prevalence of *P. vivax* in sub-Saharan Africa might owe to the fact that there is a  
237 wide range of Duffy negative alleles in the population making them more resistant to *P. vivax*  
238 (Dhorda *et al.*, 2011) (Howes *et al.*, 2011). These samples may be positive for *P.malaria* or  
239 *P.ovale* which have been documented to exist in Uganda (Asua *et al.*, 2017). There was no  
240 statistical significance at 95% confidence that any of the clinical characteristics presented were  
241 associated to plasmodium infection besides cough. Similarly, complicated Malaria has been  
242 associated with lung damage, altered pulmonary functions such as Acute respiratory distress with  
243 signs such as cough (Cabezón & Hernández-mora, 2016). In this study, all mortalities are  
244 associated with an infection which could be associated to delays in diagnosis or misdiagnosis  
245 culminating to inadequate patient support.

246 Some of the limitations of the TAC assay include the need to test 8 samples to avoid waste. In  
247 situations where the sample volumes are low plus the necessity to adhere to set turnaround times,  
248 the assay becomes expensive. This is because testing less than 6 samples becomes a waste of  
249 resources. On the other hand, circumstances of very high sample volumes, testing 6-8 samples  
250 may be a limitation to meeting the turnaround time. The products from the PCR cannot be used  
251 for any downstream analysis like sequencing. In addition, during development, a single  
252 annealing temperature is needed therefore the need for optimization of individual assays for  
253 efficiency (Heaney *et al.*, 2015).

## 254 **Recommandations**

255 From this study, it is eminent to include the TAC card testing as routine for all VHF negative  
256 testing done in country. The unspciated plasmodium positive samples need to be tested for other  
257 *Plasmodium* species such as *P.malariae* and *P.ovale*. Based on the commonly circulating AFI  
258 pathogens in Uganda, , the AFI card needs further be customization to include etiologies such

259 as; COVID-19, monkey pox virus, and measles with clear guidance from the Ministry of Health.  
260 In addition, a TAC assay targeting travelers can be designed for pathogens that are not endemic  
261 to Uganda like *Lassa fever virus*, and *Nipah virus* disease that could otherwise be imported by  
262 international travelers from countries where these etiologies are known to exist. While the  
263 strategy of duplication of pathogen targets reduces the number of pathogens being detected thus  
264 making the assay even more expensive, it could increase the efficiency of the assay.

265

## 266 **Conclusion**

267 Although the TAC cards are expensive, costing between 350 to 500 USD per card, for the  
268 number of pathogens tested and the number of samples that can be tested per card, strategic use  
269 of the cards could be a cost-effective way to perform passive surveillance for a range of  
270 pathogens that are of public health importance to Uganda. The TAC system provides flexibility  
271 of testing for multiple pathogen targets within a short period of time and without the need to  
272 purchase and maintain multiple kits, positive controls and reference material. Coupled with  
273 confirmatory testing at the appropriate reference laboratory for presumptive-positive samples  
274 identified using TAC, the system could be effective at more quickly recognizing and responding  
275 to outbreaks. Compared to singlex procedures. This study has therefore proved that the AFI-  
276 TAC testing modality is of great value and can be adopted to Uganda for AFI surveillance and  
277 outbreak investigations.

## 278 **Conflict of interest statement**

279 The authors declare no conflict of interest exists.

280 **Funding source**

281 This study was funded by the Uganda Virus Research Institute, the Viral Hemorrhagic Fevers  
282 program with support from the Centers for Disease Control and prevention

283 **Ethical approval**

284 The study was approved by the office of the Director General of Health services in the Ministry  
285 of Health Uganda.

286 **Acknowledgements**

287 I acknowledge the centers for Disease control and prevention (CDC) who funded this work  
288 through the Viral Hemorrhagic Fevers surveillance program at the Uganda Virus Research  
289 Institute.

290 **REFERENCES**

- 291 Agaba, B. B., Travis, J., Smith, D., Rugera, S. P., Zalwango, M. G., Opigo, J., Katureebe, C.,  
292 Mpirirwe, R., Bakary, D., Antonio, M., Khalid, B., Ngonzi, J., Kanya, M. R., Kaleebu, P.,  
293 Piot, P., & Cheng, Q. (2024). Emerging threat of artemisinin partial resistance markers  
294 (pfk13 mutations) in Plasmodium falciparum parasite populations in multiple geographical  
295 locations in high transmission regions of Uganda. *Malaria Journal*, 23(1), 330.  
296 <https://doi.org/10.1186/s12936-024-05158-9>
- 297 Asua, V., Tukwasibwe, S., Conrad, M., Walakira, A., Nankabirwa, J. I., Mugenyi, L., Kanya,  
298 M. R., Nsobya, S. L., & Rosenthal, P. J. (2017). Plasmodium species infecting children  
299 presenting with malaria in Uganda. *American Journal of Tropical Medicine and Hygiene*,  
300 97(3), 753–757. <https://doi.org/10.4269/ajtmh.17-0345>
- 301 Balinandi, S., Mulei, S., Whitmer, S., Nyakarahuka, L., Cossaboom, C. M., Shedroff, E.,  
302 Morales-Betoulle, M., Krapiunaya, I., Tumusiime, A., Kyondo, J., Baluku, J., Namanya, D.,  
303 Torach, C. R., Mutesi, J., Kiconco, J., Pimundu, G., Muyigi, T., Rowland, J., Nsawotebba,  
304 A., ... Klena, J. D. (2024). Crimean-Congo hemorrhagic fever cases diagnosed during an  
305 outbreak of Sudan virus disease in Uganda, 2022-23. *PLoS Neglected Tropical Diseases*,  
306 18(10), e0012595. <https://doi.org/10.1371/journal.pntd.0012595>

- 307 Cabezón, I., & Hernández-mora, M. G. (2016). *Pulmonary complications of malaria*: An  
308 *update* *BMJ*, *146*(8), 354–358.
- 309 Dhorda, M., Nyehangane, D., Rénia, L., Piola, P., Guerin, P. J., & Snounou, G. (2011).  
310 Transmission of plasmodium vivax in south-western Uganda: Report of three cases in  
311 pregnant women. *PLoS ONE*, *6*(5). <https://doi.org/10.1371/journal.pone.0019801>
- 312 Ferdousi, T., Dutta, A. K., Chowdhury, M. A. H., Islam, K., Islam, M. T., Islam, M. Z., Bulbul,  
313 M. R. H., Khan, A. I., & Qadri, F. (2023). Role of TaqMan array card in determining  
314 causative organisms of acute febrile illness in hospitalized patients. *Journal of Clinical*  
315 *Laboratory Analysis*, *37*(13–14), 1–7. <https://doi.org/10.1002/jcla.24948>
- 316 Ghai, R. R., Thurber, M. I., Bakry, A. El, Chapman, C. A., & Goldberg, T. L. (2016). Multi  
317 method assessment of patients with febrile illness reveals over diagnosis of malaria in  
318 rural Uganda. *Malaria Journal*, 1–6. <https://doi.org/10.1186/s12936-016-1502-4>
- 319 Hajia, M. (2017). *Limitations of Different PCR Protocols Used in Diagnostic Laboratories*: A  
320 *Short Review*. *1*(1), 1–6. <https://doi.org/10.30699/mmlj17-01-01>
- 321 Heaney, J., Rolfe, K., Gleadall, N. S., Greatorex, J. S., & Curran, M. D. (2015). Low-density  
322 TaqMan® array cards for the detection of pathogens. In *Methods in Microbiology* (1st ed.,  
323 Vol. 42). Elsevier Ltd. <https://doi.org/10.1016/bs.mim.2015.06.002>
- 324 Hercik, C., Cosmas, L., Mogeni, O. D., Wamola, N., Kohi, W., Omballa, V., Ochieng, M.,  
325 Lidechi, S., Bonventure, J., Ochieng, C., Onyango, C., Fields, B. S., Mfinanga, S., &  
326 Montgomery, J. M. (2017). A diagnostic and epidemiologic investigation of acute febrile  
327 illness (AFI) in Kilombero, Tanzania. *PLoS ONE*, *12*(12), 5–14.  
328 <https://doi.org/10.1371/journal.pone.0189712>
- 329 Howes, R. E., Patil, A. P., Piel, F. B., Nyangiri, O. A., Kabaria, C. W., Gething, P. W.,  
330 Zimmerman, P. A., Barnadas, C., Beall, C. M., Gebremedhin, A., Ménard, D., Williams, T.  
331 N., Weatherall, D. J., & Hay, S. I. (2011). The global distribution of the Duffy blood group.  
332 *Nature Communications*, *2*(1). <https://doi.org/10.1038/ncomms1265>
- 333 Kharod, G., Person, M., Folkema, A., Galloway, R., Elrod, M., Perniciaro, J., Nicholson, W.,  
334 Patel, N., Bwogi, J., Bukonya, H., Drakeley, C., Mbulaiteye, S., Blaney, D., & Shadomy, S.

- 335 (2016). Uganda National Acute Febrile Illness Agent Detection Serosurvey 2004-2005.  
336 *International Journal of Infectious Diseases*, 45, 180.  
337 <https://doi.org/10.1016/j.ijid.2016.02.422>
- 338 Kodani, M., Yang, G., Conklin, L. M., Travis, T. C., Whitney, C. G., Anderson, L. J., Schrag, S.  
339 J., Taylor, T. H., Beall, B. W., Breiman, R. F., Feikin, D. R., Njenga, M. K., Mayer, L. W.,  
340 Oberste, M. S., Tondella, M. L. C., Winchell, J. M., Lindstrom, S. L., Erdman, D. D., &  
341 Fields, B. S. (2011). *Application of TaqMan Low-Density Arrays for Simultaneous*  
342 *Detection of Multiple Respiratory Pathogens* □. 49(6), 2175–2182.  
343 <https://doi.org/10.1128/JCM.02270-10>
- 344 Lesho, E., Clifford, R., Onmus-Leone, F., Appalla, L., Snesrud, E., Kwak, Y., Ong, A.,  
345 Maybank, R., Waterman, P., Rohrbeck, P., Julius, M., Roth, A., Martinez, J., Nielsen, L.,  
346 Steele, E., McGann, P., & Hinkle, M. (2016). The challenges of implementing next  
347 generation sequencing across a large healthcare system, and the molecular epidemiology  
348 and antibiotic susceptibilities of carbapenemase-producing bacteria in the healthcare system  
349 of the U.S. Department of Defense. *PLoS ONE*, 11(5), 1–12.  
350 <https://doi.org/10.1371/journal.pone.0155770>
- 351 Liu, J., Ochieng, C., Wiersma, S., Ströher, U., Towner, J. S., Whitmer, S., Nichol, S. T., Moore,  
352 C. C., Kersh, G. J., Kato, C., Sexton, C., Petersen, J., Massung, R., Hercik, C., Crump, J. A.,  
353 Kibiki, G., Maro, A., Mujaga, B., Gratz, J., ... Houpt, E. (2016). *Development of a TaqMan*  
354 *Array Card for Acute-Febrile-Illness Outbreak Investigation and Surveillance of Emerging*  
355 *Pathogens , Including Ebola Virus*. 54(1), 49–58. [https://doi.org/10.1128/JCM.02257-](https://doi.org/10.1128/JCM.02257-15)  
356 15.Editor
- 357 Mambula, G., Nanjebe, D., Munene, A., Guindo, O., Salifou, A., Mamaty, A. A., Rattigan, S.,  
358 Ellis, S., Khavessian, N., van der Pluijm, R. W., Marquer, C., Adehossi, I. A., &  
359 Langendorf, C. (2023). Practices and challenges related to antibiotic use in paediatric  
360 treatment in hospitals and health centres in Niger and Uganda: a mixed methods study.  
361 *Antimicrobial Resistance and Infection Control*, 12(1), 1–12.  
362 <https://doi.org/10.1186/s13756-023-01271-7>
- 363 Maze, M. J., Bassat, Q., Feasey, N. A., Mandomando, I., Musicha, P., & Crump, J. A. (2018).

- 364 The epidemiology of febrile illness in sub-Saharan Africa: implications for diagnosis and  
365 management. *Clinical Microbiology and Infection*, 24(8), 808–814.  
366 <https://doi.org/10.1016/j.cmi.2018.02.011>
- 367 Racsa, L. D., Kraft, C. S., Olinger, G. G., & Hensley, L. E. (2016). Viral Hemorrhagic Fever  
368 Diagnostics. *Clinical Infectious Diseases*, 62(2), 214–219.  
369 <https://doi.org/10.1093/cid/civ792>
- 370 Ramesh, A., Nakielny, S., Hsu, J., Kyohere, M., Byaruhanga, O., Bourcy, C. De, Egger, R.,  
371 Dimitrov, B., Juan, F., Sheu, J., Wang, J., Kalantar, K., Langelier, C., Ruel, T., Mpimbaza,  
372 A., Wilson, M. R., Rosenthal, P. J., & Id, L. D. (2019). *Metagenomic next-generation*  
373 *sequencing of samples from pediatric febrile illness in. Lmic*, 1–17.
- 374 Rose, H. L., Rachwal, P. A., Murch, A. L., Weller, S. A., Lukaszewski, R. A., & Cox, V. (2012).  
375 The Potential of TaqMan Array Cards for Detection of Multiple Biological Agents by Real-  
376 Time PCR. *PLoS ONE*, 7(4), e35971. <https://doi.org/10.1371/journal.pone.0035971>
- 377 Shoemaker, T., Balinandi, S., Tumusiime, A., Wamala, J., Knust, B., Schafer, I., Campbell, S.,  
378 Cannon, D., Erickson, B. R., Gibbons, A., Nayakarahuka, L., Lutwama, J., Mbidde, E.,  
379 Ströher, U., Rollin, P., & Nichol, S. (2013). Establishment and successes of the uganda  
380 national viral hemorrhagic fever surveillance program and high-containment laboratory,  
381 2010-2013. *American Journal of Tropical Medicine and Hygiene*.
- 382 Wamala, J. F., Malimbo, M., Okot, C. L., Atai-Omoruto, A. D., Tenywa, E., Miller, J. R.,  
383 Balinandi, S., Shoemaker, T., Oyoo, C., Omony, E. O., Kagirita, A., Musenero, M. M.,  
384 Makumbi, I., Nanyunja, M., Lutwama, J. J., Downing, R., & Mbonye, A. K. (2012).  
385 Epidemiological and laboratory characterization of a yellow fever outbreak in northern  
386 Uganda, October 2010-January 2011. *International Journal of Infectious Diseases*.  
387 <https://doi.org/10.1016/j.ijid.2012.03.004>
- 388 Zar, H. J., Madhi, S. A., Aston, S. J., & Gordon, S. B. (2013). Pneumonia in low and middle  
389 income countries: Progress and challenges. *Thorax*, 68(11), 1052–1056.  
390 <https://doi.org/10.1136/thoraxjnl-2013-204247>
- 391 Agaba, B. B., Travis, J., Smith, D., Rugera, S. P., Zalwango, M. G., Opigo, J., Katureebe, C.,

- 392 Mpirirwe, R., Bakary, D., Antonio, M., Khalid, B., Ngonzi, J., Kamya, M. R., Kaleebu, P.,  
393 Piot, P., & Cheng, Q. (2024). Emerging threat of artemisinin partial resistance markers  
394 (pfk13 mutations) in Plasmodium falciparum parasite populations in multiple geographical  
395 locations in high transmission regions of Uganda. *Malaria Journal*, 23(1), 330.  
396 <https://doi.org/10.1186/s12936-024-05158-9>
- 397 Asua, V., Tukwasibwe, S., Conrad, M., Walakira, A., Nankabirwa, J. I., Mugenyi, L., Kamya,  
398 M. R., Nsohya, S. L., & Rosenthal, P. J. (2017). Plasmodium species infecting children  
399 presenting with malaria in Uganda. *American Journal of Tropical Medicine and Hygiene*,  
400 97(3), 753–757. <https://doi.org/10.4269/ajtmh.17-0345>
- 401 Balinandi, S., Mulei, S., Whitmer, S., Nyakarahuka, L., Cossaboom, C. M., Shedroff, E.,  
402 Morales-Betoulle, M., Krapipunaya, I., Tumusiime, A., Kyondo, J., Baluku, J., Namanya, D.,  
403 Torach, C. R., Mutesi, J., Kiconco, J., Pimundu, G., Muyigi, T., Rowland, J., Nsawotebba,  
404 A., ... Klena, J. D. (2024). Crimean-Congo hemorrhagic fever cases diagnosed during an  
405 outbreak of Sudan virus disease in Uganda, 2022-23. *PLoS Neglected Tropical Diseases*,  
406 18(10), e0012595. <https://doi.org/10.1371/journal.pntd.0012595>
- 407 Cabezón, I., & Hernández-mora, M. G. (2016). *Pulmonary complications of malaria*: An  
408 *update* [7]. 146(8), 354–358.
- 409 Dhorda, M., Nyehangane, D., Rénia, L., Piola, P., Guerin, P. J., & Snounou, G. (2011).  
410 Transmission of plasmodium vivax in south-western Uganda: Report of three cases in  
411 pregnant women. *PLoS ONE*, 6(5). <https://doi.org/10.1371/journal.pone.0019801>
- 412 Ferdousi, T., Dutta, A. K., Chowdhury, M. A. H., Islam, K., Islam, M. T., Islam, M. Z., Bulbul,  
413 M. R. H., Khan, A. I., & Qadri, F. (2023). Role of TaqMan array card in determining  
414 causative organisms of acute febrile illness in hospitalized patients. *Journal of Clinical  
415 Laboratory Analysis*, 37(13–14), 1–7. <https://doi.org/10.1002/jcla.24948>
- 416 Ghai, R. R., Thurber, M. I., Bakry, A. El, Chapman, C. A., & Goldberg, T. L. (2016). Multi □  
417 method assessment of patients with febrile illness reveals over □ diagnosis of malaria in  
418 rural Uganda. *Malaria Journal*, 1–6. <https://doi.org/10.1186/s12936-016-1502-4>
- 419 Hajia, M. (2017). *Limitations of Different PCR Protocols Used in Diagnostic Laboratories*: A



- 420        *Short Review*. *I*(1), 1–6. <https://doi.org/10.30699/mmlj17-01-01>
- 421 Heaney, J., Rolfe, K., Gleadall, N. S., Greatorex, J. S., & Curran, M. D. (2015). Low-density  
422        TaqMan® array cards for the detection of pathogens. In *Methods in Microbiology* (1st ed.,  
423        Vol. 42). Elsevier Ltd. <https://doi.org/10.1016/bs.mim.2015.06.002>
- 424 Hercik, C., Cosmas, L., Mogeni, O. D., Wamola, N., Kohi, W., Omballa, V., Ochieng, M.,  
425        Lidechi, S., Bonventure, J., Ochieng, C., Onyango, C., Fields, B. S., Mfinanga, S., &  
426        Montgomery, J. M. (2017). A diagnostic and epidemiologic investigation of acute febrile  
427        illness (AFI) in Kilombero, Tanzania. *PLoS ONE*, *12*(12), 5–14.  
428        <https://doi.org/10.1371/journal.pone.0189712>
- 429 Howes, R. E., Patil, A. P., Piel, F. B., Nyangiri, O. A., Kabaria, C. W., Gething, P. W.,  
430        Zimmerman, P. A., Barnadas, C., Beall, C. M., Gebremedhin, A., Ménard, D., Williams, T.  
431        N., Weatherall, D. J., & Hay, S. I. (2011). The global distribution of the Duffy blood group.  
432        *Nature Communications*, *2*(1). <https://doi.org/10.1038/ncomms1265>
- 433 Kharod, G., Person, M., Folkema, A., Galloway, R., Elrod, M., Perniciaro, J., Nicholson, W.,  
434        Patel, N., Bwogi, J., Bukonya, H., Drakeley, C., Mbulaiteye, S., Blaney, D., & Shadomy, S.  
435        (2016). Uganda National Acute Febrile Illness Agent Detection Serosurvey 2004-2005.  
436        *International Journal of Infectious Diseases*, *45*, 180.  
437        <https://doi.org/10.1016/j.ijid.2016.02.422>
- 438 Kodani, M., Yang, G., Conklin, L. M., Travis, T. C., Whitney, C. G., Anderson, L. J., Schrag, S.  
439        J., Taylor, T. H., Beall, B. W., Breiman, R. F., Feikin, D. R., Njenga, M. K., Mayer, L. W.,  
440        Oberste, M. S., Tondella, M. L. C., Winchell, J. M., Lindstrom, S. L., Erdman, D. D., &  
441        Fields, B. S. (2011). *Application of TaqMan Low-Density Arrays for Simultaneous*  
442        *Detection of Multiple Respiratory Pathogens* □. *49*(6), 2175–2182.  
443        <https://doi.org/10.1128/JCM.02270-10>
- 444 Lesho, E., Clifford, R., Onmus-Leone, F., Appalla, L., Snedrud, E., Kwak, Y., Ong, A.,  
445        Maybank, R., Waterman, P., Rohrbeck, P., Julius, M., Roth, A., Martinez, J., Nielsen, L.,  
446        Steele, E., McGann, P., & Hinkle, M. (2016). The challenges of implementing next  
447        generation sequencing across a large healthcare system, and the molecular epidemiology  
448        and antibiotic susceptibilities of carbapenemase-producing bacteria in the healthcare system

- 449 of the U.S. Department of Defense. *PLoS ONE*, *11*(5), 1–12.  
450 <https://doi.org/10.1371/journal.pone.0155770>
- 451 Liu, J., Ochieng, C., Wiersma, S., Ströher, U., Towner, J. S., Whitmer, S., Nichol, S. T., Moore,  
452 C. C., Kersh, G. J., Kato, C., Sexton, C., Petersen, J., Massung, R., Hercik, C., Crump, J. A.,  
453 Kibiki, G., Maro, A., Mujaga, B., Gratz, J., ... Houpt, E. (2016). *Development of a TaqMan*  
454 *Array Card for Acute-Febrile-Illness Outbreak Investigation and Surveillance of Emerging*  
455 *Pathogens , Including Ebola Virus*. *54*(1), 49–58. [https://doi.org/10.1128/JCM.02257-](https://doi.org/10.1128/JCM.02257-15)  
456 15.Editor
- 457 Mambula, G., Nanjebe, D., Munene, A., Guindo, O., Salifou, A., Mamaty, A. A., Rattigan, S.,  
458 Ellis, S., Khavessian, N., van der Pluijm, R. W., Marquer, C., Adehossi, I. A., &  
459 Langendorf, C. (2023). Practices and challenges related to antibiotic use in paediatric  
460 treatment in hospitals and health centres in Niger and Uganda: a mixed methods study.  
461 *Antimicrobial Resistance and Infection Control*, *12*(1), 1–12.  
462 <https://doi.org/10.1186/s13756-023-01271-7>
- 463 Maze, M. J., Bassat, Q., Feasey, N. A., Mandomando, I., Musicha, P., & Crump, J. A. (2018).  
464 The epidemiology of febrile illness in sub-Saharan Africa □: implications for diagnosis and  
465 management. *Clinical Microbiology and Infection*, *24*(8), 808–814.  
466 <https://doi.org/10.1016/j.cmi.2018.02.011>
- 467 Racsa, L. D., Kraft, C. S., Olinger, G. G., & Hensley, L. E. (2016). Viral Hemorrhagic Fever  
468 Diagnostics. *Clinical Infectious Diseases*, *62*(2), 214–219.  
469 <https://doi.org/10.1093/cid/civ792>
- 470 Ramesh, A., Nakielny, S., Hsu, J., Kyohere, M., Byaruhanga, O., Bourcy, C. De, Egger, R.,  
471 Dimitrov, B., Juan, F., Sheu, J., Wang, J., Kalantar, K., Langelier, C., Ruel, T., Mpimbaza,  
472 A., Wilson, M. R., Rosenthal, P. J., & Id, L. D. (2019). *Metagenomic next-generation*  
473 *sequencing of samples from pediatric febrile illness in. Lmic*, 1–17.
- 474 Rose, H. L., Rachwal, P. A., Murch, A. L., Weller, S. A., Lukaszewski, R. A., & Cox, V. (2012).  
475 The Potential of TaqMan Array Cards for Detection of Multiple Biological Agents by Real-  
476 Time PCR. *PLoS ONE*, *7*(4), e35971. <https://doi.org/10.1371/journal.pone.0035971>

- 477 Shoemaker, T., Balinandi, S., Tumusiime, A., Wamala, J., Knust, B., Schafer, I., Campbell, S.,  
478 Cannon, D., Erickson, B. R., Gibbons, A., Nayakarahuka, L., Lutwama, J., Mbidde, E.,  
479 Ströher, U., Rollin, P., & Nichol, S. (2013). Establishment and successes of the Uganda  
480 national viral hemorrhagic fever surveillance program and high-containment laboratory,  
481 2010-2013. *American Journal of Tropical Medicine and Hygiene*.
- 482 Wamala, J. F., Malimbo, M., Okot, C. L., Atai-Omoruto, A. D., Tenywa, E., Miller, J. R.,  
483 Balinandi, S., Shoemaker, T., Oyoo, C., Omony, E. O., Kagirita, A., Musenero, M. M.,  
484 Makumbi, I., Nanyunja, M., Lutwama, J. J., Downing, R., & Mbonye, A. K. (2012).  
485 Epidemiological and laboratory characterization of a yellow fever outbreak in northern  
486 Uganda, October 2010-January 2011. *International Journal of Infectious Diseases*.  
487 <https://doi.org/10.1016/j.ijid.2012.03.004>
- 488 Zar, H. J., Madhi, S. A., Aston, S. J., & Gordon, S. B. (2013). Pneumonia in low and middle  
489 income countries: Progress and challenges. *Thorax*, 68(11), 1052–1056.  
490 <https://doi.org/10.1136/thoraxjnl-2013-204247>
- 491
